# Supplementary material for: Incisional hernia recurrence through genomic profiling: a pilot study
Source: Springer Nature journal article supplement (doi:10.1007/s10029-012-0923-4), 2012-05-30

**Online Resource 1**

List of differentially expressed genes in skin (q&lt;30%) from microarray, fold=RH/NC.

| RefSeq       | nuID               | Symbol    | AveExpr | p    | q    | Fold |
|--------------|--------------------|-----------|---------|------|------|------|
| NM_004004    | cjif7cfQC.v58VfSXU | GJB2      | 10.08   | 0    | 0.14 | 0.38 |
| NM_002638    | NeHISg0ILnuCnfm06U | PI3       | 8.45    | 0.01 | 0.29 | 0.46 |
| NM_013372    | 6qgEA34VJ4E7fXi0uU | GREM1     | 8.38    | 0    | 0.09 | 0.49 |
| NM_001126128 | 3fSd576nru6EgoOgJQ | PROK2     | 9.47    | 0    | 0.09 | 0.49 |
| NM_012153    | xKpN5Q93R7r193h.l4 | EHF       | 11.38   | 0    | 0.2  | 0.49 |
| NM_001114978 | 3JikV8enxddOkIx3X4 | TP63      | 10.1    | 0    | 0.24 | 0.5  |
|              | I7R7dcEsfJLt45NEql |           | 8.18    | 0    | 0.08 | 0.51 |
| NM_007231    | WkSP0Ei5_kz7KudDro | SLC6A14   | 9.47    | 0    | 0.21 | 0.51 |
| NM_002275    | N_SiAbV_UdVHdNKULo | KRT15     | 10.63   | 0    | 0.09 | 0.53 |
| NM_006025    | 3_1VBVHiBwOexRIIq4 | P11       | 10.1    | 0    | 0.11 | 0.54 |
| NM_005518    | cpX09d1OeQ0e16nzk  | HMGCS2    | 8.93    | 0.01 | 0.26 | 0.54 |
|              | 0XR.jqKleSs6iSylfg |           | 8.08    | 0    | 0.08 | 0.55 |
| NM_144670    | iqp3UiKla6yKuByllw | A2ML1     | 9.25    | 0    | 0.17 | 0.55 |
|              | E.euXOJyc0XF4Cuflo |           | 11.11   | 0    | 0.23 | 0.56 |
| NM_004925    | in3Ep.6gsq6O6sqeoo | AQP3      | 12.49   | 0.01 | 0.26 | 0.56 |
| NM_005792    | ilUo8l6OXwmOISq5_s | MPHOSPH6  | 9.62    | 0.01 | 0.27 | 0.56 |
|              | ifuT0uCbzzIEBwXF0U |           | 8.77    | 0    | 0.14 | 0.57 |
|              | iXogXCHUAG6x6KLoR4 |           | 9.75    | 0    | 0.14 | 0.57 |
|              | WkCMLn1QI16lFwh1AI |           | 9.53    | 0    | 0.17 | 0.57 |
| NM_003045    | EdV._eEEe7E_FH1xTE | SLC7A1    | 10.63   | 0    | 0.2  | 0.58 |
| NM_005127    | oEqyEpSqACkdKkRJPk | CLEC2B    | 9.61    | 0    | 0.21 | 0.58 |
| NM_020639    | K.qs6qi794Xn_SG5dY | RIPK4     | 9.99    | 0    | 0.19 | 0.59 |
| NM_003222    | ZYJD__eftFVC1W6K94 | TFAP2C    | 10.52   | 0.01 | 0.29 | 0.59 |
| NM_006919    | l4Wolmt25zei1xEKX8 | SERPINB3  | 8.08    | 0.01 | 0.27 | 0.61 |
|              | TdINSqx0pHob6N0k0k |           | 7.96    | 0    | 0.08 | 0.62 |
|              | NLi56u6yjuR59cd17o |           | 8.75    | 0    | 0.11 | 0.62 |
| NM_001040101 | B_mSa7k0im7niCrrvA | D4S234E   | 11.58   | 0    | 0.14 | 0.62 |
| NM_080474    | 6lHqnv2gK0cY36ui8  | SERPINB12 | 9.35    | 0    | 0.23 | 0.62 |
|              | fqfEtK7Q_0sG5X4fUo |           | 8.11    | 0    | 0.13 | 0.63 |
|              | NVfUXd.l7KOx7Oy05E |           | 9.18    | 0    | 0.16 | 0.63 |
| NM_173515    | 05P_F70u3t9SRruxH0 | CNKSR3    | 9.18    | 0    | 0.21 | 0.64 |
| NM_019852    | cefr67QKA1UKfQUq3o | METTL3    | 10.06   | 0    | 0.21 | 0.64 |
|              | N07Ve69f_q_G.6qe.U |           | 9.94    | 0    | 0.24 | 0.64 |
| NM_004869    | 9q37X0X.C9KgS.teFE | VPS4B     | 10.86   | 0.01 | 0.25 | 0.64 |
| NM_020168    | fKYFF1q.U07QrRKTU4 | PAK6      | 8.67    | 0.01 | 0.27 | 0.64 |
|              | 9oJYvTQ.7gg_fejh4U |           | 9.18    | 0.01 | 0.27 | 0.64 |
|              | NenOs7LA6pXszqPIBU |           | 9.23    | 0    | 0.2  | 0.65 |
| NM_000222    | ulvN6CwU.kei9zndkU | KIT       | 8.69    | 0    | 0.11 | 0.66 |
|              | r4h0auSuTKgp69e1Kg |           | 9.46    | 0    | 0.2  | 0.66 |

|              |                    |          |       |      |      |      |
|--------------|--------------------|----------|-------|------|------|------|
|              | WZNV5dTXLAh1_c55J4 |          | 9.76  | 0    | 0.2  | 0.66 |
| NM_018686    | Hjgi5_ClupclpnXnj  | CMAS     | 10.52 | 0    | 0.21 | 0.66 |
| NM_001114106 | 0odOn.BxDak9Su6ktU | SLC44A3  | 8.36  | 0    | 0.23 | 0.66 |
| NM_018290    | 3rfEI9QDB1L6kVOJyg | PGM2     | 9.2   | 0.01 | 0.25 | 0.66 |
| NM_004537    | lrfoO4ET7_y5zU9d14 | NAP1L1   | 9.61  | 0.01 | 0.27 | 0.66 |
| NM_033505    | fSrop9yt5OOOqVv3pQ | SELI     | 9.19  | 0    | 0.2  | 0.67 |
| NM_001864    | uFlaBZ.SBYuZiASCd8 | COX7A1   | 8.36  | 0    | 0.21 | 1.5  |
|              | BI4QMLSSfMVEglLIL4 |          | 9.94  | 0    | 0.24 | 1.51 |
| NM_000393    | BiTb1Dn70e9d7THs3o | COL5A2   | 9.11  | 0.01 | 0.27 | 1.51 |
| NM_003681    | 9pXn7IO6O.uJdrXEkc | PDXK     | 9.26  | 0.01 | 0.28 | 1.51 |
| NM_005110    | Z0ad.8JXpJP_tXnX5U | GFPT2    | 8.42  | 0.01 | 0.29 | 1.51 |
| NM_145040    | NA6luyXip675eXVe58 | PRKCDBP  | 8.65  | 0    | 0.11 | 1.52 |
| NM_001078174 | oHjV5_5KUuinffogQ  | SLC29A1  | 9.45  | 0    | 0.2  | 1.52 |
| NM_003278    | 3Vk2XEIHqlel0WZBWM | CLEC3B   | 8.12  | 0    | 0.24 | 1.52 |
| NM_001122824 | rTefUe71Rq5Tgu7iiU | TACC1    | 10.34 | 0.01 | 0.24 | 1.52 |
| NM_002905    | ZeVUV6x5euXIEAwkcE | RDH5     | 8.3   | 0    | 0.2  | 1.53 |
| NM_005545    | NKnCtd75_vUXyCKdY  | ISLR     | 8.75  | 0    | 0.2  | 1.54 |
| NM_001425    | BgprkrXTrndXT3ee3c | EMP3     | 8.42  | 0    | 0.24 | 1.54 |
| NM_000163    | crpRMJTz0cs4cvu3pl | GHR      | 8.71  | 0.01 | 0.29 | 1.54 |
| NM_004107    | K7j1JRZeFNZT1h5wCY | FCGRT    | 10.4  | 0    | 0.21 | 1.55 |
| NM_000803    | ug564jn06h6q3XnS3o | FOLR2    | 8.47  | 0    | 0.24 | 1.55 |
| NM_004356    | cvYiWLe6kd3l9ORe18 | CD81     | 11.04 | 0    | 0.16 | 1.56 |
| NM_007021    | i6SQgrik0qBqDSnqHg | C10orf10 | 9.04  | 0    | 0.22 | 1.56 |
| NM_001393    | IUj4GjV6c7v6UToFKU | ECM2     | 8.44  | 0    | 0.21 | 1.57 |
|              | E9SiZdCJ69iVeughOQ |          | 9.29  | 0.01 | 0.29 | 1.57 |
| NM_015149    | Tv166Elqw5.yedk5_0 | RGL1     | 9.76  | 0    | 0.2  | 1.58 |
| NM_006169    | 0Qq1lgoogviEprQkrk | NNMT     | 8.9   | 0    | 0.21 | 1.58 |
|              | cRL3u0T83431EXRD18 |          | 8.64  | 0.01 | 0.27 | 1.58 |
| NM_001007097 | 3i4kVIO74FBVRVwceE | NTRK2    | 9.2   | 0    | 0.17 | 1.59 |
| NM_194272    | rpT9lfql4pp77T5414 | RBPMS2   | 9.67  | 0    | 0.2  | 1.59 |
| NM_001154    | 3uXkUVR5fX0kX8nk.s | ANXA5    | 11.27 | 0    | 0.21 | 1.59 |
| NM_006207    | xinjtCRRFUFUm3bi1g | PDGFRL   | 8.95  | 0    | 0.22 | 1.59 |
| NM_003254    | 3LV5rVlyXg15Wi6CeA | TIMP1    | 8.72  | 0    | 0.22 | 1.59 |
| NM_002076    | BXu.k13vXPeV_d7tN0 | GNS      | 10.13 | 0    | 0.23 | 1.59 |
| NM_022343    | TknXgre75HtFLdCc5c | GLIPR2   | 8.88  | 0.01 | 0.27 | 1.59 |
| NM_005693    | NoEh4gqQE9eonqQojU | NR1H3    | 8.9   | 0.01 | 0.29 | 1.59 |
|              | KuhFG6TjX41DSPiV6Y |          | 8.96  | 0.01 | 0.29 | 1.59 |
| NM_001753    | 34ROIXVXIKJ.oXDUJM | CAV1     | 8.82  | 0    | 0.17 | 1.6  |
| NM_002178    | HkHUh4rcWKp0BHcbIQ | IGFBP6   | 8.34  | 0    | 0.21 | 1.6  |
| NM_003277    | BLh_l6F1a3R1JN1UpA | CLDN5    | 8.72  | 0    | 0.21 | 1.6  |
| NM_000396    | 9KcljuHEl5V4e77Vkk | CTSK     | 10.36 | 0    | 0.24 | 1.6  |
| NM_015869    | 0kBVz1Oe86uAd6iPdc | PPARG    | 8.49  | 0    | 0.19 | 1.61 |
| NM_002197    | fX.X0i4NNSHXToytq4 | ACO1     | 8.74  | 0.01 | 0.26 | 1.61 |

|              |                    |         |       |      |      |      |
|--------------|--------------------|---------|-------|------|------|------|
| NM_006832    | o9cnRMIQCrmKiK6PFI | FERMT2  | 8.86  | 0.01 | 0.29 | 1.61 |
| NM_000304    | xyJ_nq3Ke9711Ch7ek | PMP22   | 9.21  | 0    | 0.12 | 1.62 |
| NM_006288    | leKQIOi4hUoloR90oA | THY1    | 8.35  | 0    | 0.14 | 1.62 |
| NM_005165    | NU44rJ91ep3X35eV7c | ALDOC   | 9.23  | 0    | 0.22 | 1.62 |
| NM_001386    | ceSnuwk78Xvp_f7u3s | DPYSL2  | 10.63 | 0    | 0.23 | 1.62 |
| NM_000093    | TvUKwl2wK01RTRQJdY | COL5A1  | 9.33  | 0    | 0.12 | 1.63 |
| NM_000138    | TvxV_n_735Oj_q_iqU | FBN1    | 8.54  | 0    | 0.2  | 1.63 |
| NM_004877    | N10rh6ofoFcoXgQUlc | GMFG    | 9.44  | 0    | 0.24 | 1.63 |
| NM_001996    | 0W6n1p3e6OkrTuCE0M | FBLN1   | 10    | 0.01 | 0.29 | 1.63 |
| NM_002961    | Z99V3cQV3ddJn339_s | S100A4  | 9.36  | 0    | 0.2  | 1.64 |
|              | uJNF9keCLOiLcejh6U |         | 9.76  | 0    | 0.24 | 1.64 |
| NM_018243    | rJBOfrD_k3vCsoi64E | SEPT11  | 9.34  | 0.01 | 0.28 | 1.65 |
| NM_015463    | BVf4Qn1Mt9IRkT46TU | CNRIP1  | 9.62  | 0.01 | 0.29 | 1.65 |
| NM_002508    | 6SXZ.isVFte0nX4XOI | NID1    | 8.37  | 0.01 | 0.29 | 1.65 |
| NM_002448    | QrVSSD4S_BlnpTt14  | MSX1    | 8.63  | 0.01 | 0.29 | 1.66 |
| NM_001645    | oTiheCrhNUoql3gP1Q | APOC1   | 8.55  | 0.01 | 0.27 | 1.68 |
| NM_001541    | iiklMviV4_USFSRUkA | HSPB2   | 8.48  | 0    | 0.09 | 1.69 |
| NM_014945    | Hq4qllqC3nu907K00k | ABLIM3  | 9.49  | 0.01 | 0.27 | 1.69 |
| NM_002609    | Wo1Ui_tQoqlur3QxrE | PDGFRB  | 9.08  | 0    | 0.2  | 1.7  |
| NM_015645    | iteeekKDqBLp7eY0rc | C1QTNF5 | 9.01  | 0    | 0.23 | 1.7  |
| NM_000186    | foILDsE5PDJl6EoKUE | CFH     | 9.98  | 0    | 0.14 | 1.72 |
| NM_001343    | KgReX3Fd6_ojklFE1c | DAB2    | 8.74  | 0    | 0.15 | 1.72 |
| NM_003380    | QQ4tXoGUjm4Dolgf5Y | VIM     | 11.67 | 0.01 | 0.24 | 1.72 |
| NM_001105206 | uX0SnkxIH_4_OhFS4k | LAMA4   | 9.27  | 0    | 0.24 | 1.73 |
| NM_006902    | xXbV1QjvxxGKp9MGj0 | PRRX1   | 9.68  | 0.01 | 0.29 | 1.73 |
| NM_004460    | ueFIFGnzWI7UYFHzEU | FAP     | 8.33  | 0    | 0.09 | 1.74 |
| NM_001920    | KtEiSRcVXXX9RF5Ad8 | DCN     | 11.65 | 0    | 0.15 | 1.74 |
| NM_199511    | TpHklApjH1lvfsp5zo | CCDC80  | 9.19  | 0.01 | 0.25 | 1.74 |
| NM_020311    | E3u67.sWkajOgYAef4 | CXCR7   | 10.68 | 0    | 0.12 | 1.77 |
| NM_000014    | ZfoDn4IUQp4Auf56LU | A2M     | 11.13 | 0.01 | 0.29 | 1.78 |
| NM_006500    | onSpVBXIKIQOlg6x8o | MCAM    | 8.48  | 0    | 0.17 | 1.79 |
| NM_004369    | Zl7s26lBCIUH.09XIU | COL6A3  | 11.21 | 0    | 0.2  | 1.8  |
| NM_001885    | NtdHuDoUKAST3pXiZE | CRYAB   | 11.54 | 0    | 0.21 | 1.8  |
| NM_001387    | NoSEsN17je5ye4pJ3o | DPYSL3  | 11.79 | 0.01 | 0.26 | 1.8  |
| NM_153370    | uEk7md1eLl7snqjqj0 | PI16    | 8.3   | 0    | 0.09 | 1.81 |
| NM_173833    | xKJBHxp4QcJQzpxK0  | SCARA5  | 8.68  | 0    | 0.1  | 1.83 |
|              | cqSF81At6xB7XyHjiQ |         | 8.85  | 0    | 0.24 | 1.83 |
| NM_020404    | 3ISUq13dBRYH6d0oHc | CD248   | 8.44  | 0    | 0.22 | 1.84 |
| NM_002404    | H6ddfnVeeOu1xVgdQA | MFAP4   | 9.19  | 0.01 | 0.24 | 1.84 |
| NM_000552    | WLnLXeTved_5X3iVE  | VWF     | 9.94  | 0.01 | 0.3  | 1.87 |
| NM_003734    | 9jx.6iqBSyvihKlqCo | AOC3    | 9.27  | 0    | 0.2  | 1.9  |
| NM_002084    | 6faKG5XRV0etR6fiHQ | GPX3    | 9.14  | 0    | 0.21 | 1.9  |
| NM_019043    | 6Tji71lqJNnhViZK8  | APBB1IP | 8.98  | 0    | 0.24 | 1.9  |

|              |                    |          |       |      |      |      |
|--------------|--------------------|----------|-------|------|------|------|
|              | x..cii0ZxKkrd313Xk |          | 8.76  | 0    | 0.21 | 1.92 |
| NM_002775    | ZEOblyCCVRqJSjqHrY | HTRA1    | 10.07 | 0    | 0.1  | 1.95 |
| NM_017549    | flJd37V6.Xzu_Duvi8 | EPDR1    | 8.78  | 0    | 0.19 | 1.97 |
| NM_004385    | NSUyuS.n3E45wKeYOo | VCAN     | 9.32  | 0    | 0.11 | 1.99 |
| NM_003613    | TVOcePpG6VUQ6RDAIU | CILP     | 8.55  | 0    | 0.16 | 1.99 |
|              | 0WIk6_3_rIUHhRFVPU |          | 9.51  | 0.01 | 0.24 | 1.99 |
|              | unkUFKERJfAjTpJcTl |          | 8.22  | 0.01 | 0.24 | 1.99 |
| NM_003118    | QZJ1UNEckE.QufiJTk | SPARC    | 10.87 | 0.01 | 0.24 | 2.01 |
| NM_002345    | Nm.o6Q2TdIBS31Fozs | LUM      | 9.34  | 0    | 0.12 | 2.03 |
| NM_002615    | 0oSSPUSHgCnlXsK.Q4 | SERPINF1 | 10.59 | 0    | 0.13 | 2.03 |
| NM_001093    | ByecV6BrqSllxygO5l | ACACB    | 11.21 | 0.01 | 0.24 | 2.03 |
| NM_000088    | u1dct7Xm13tVq.SlQc | COL1A1   | 11.38 | 0    | 0.21 | 2.05 |
| NM_002305    | NISQQXuXkfQV2fQZUY | LGALS1   | 9.29  | 0    | 0.22 | 2.05 |
| NM_145234    | 0i67tjX4E3XUClci0  | CHRD1    | 9.6   | 0    | 0.24 | 2.05 |
| NM_002666    | uVidV71X0_AFFGuU3c | PLIN     | 8.18  | 0    | 0.21 | 2.09 |
| NM_012193    | l3uSS2p6Od7pf36tdM | FZD4     | 9.28  | 0    | 0.2  | 2.11 |
|              | upJRRddreVXTwD0b1Q |          | 9.34  | 0    | 0.2  | 2.13 |
| NM_138455    | uKH_4KD656PLo75zeo | CTHRC1   | 10.97 | 0    | 0.14 | 2.17 |
| NM_001937    | 9ekhFegV6onHpAd16M | DPT      | 11.3  | 0    | 0.2  | 2.17 |
| NM_006744    | NVUgmSCPsKSaSiie5c | RBP4     | 8.58  | 0    | 0.2  | 2.17 |
| NM_144617    | rX0IVB4kVnePVRJf3U | HSPB6    | 8.93  | 0    | 0.24 | 2.17 |
| NM_000090    | o0Hn7ArnXf.37T560l | COL3A1   | 11    | 0    | 0.17 | 2.3  |
| NM_003739    | ilrh6EzRdx8DW178mE | AKR1C3   | 9.87  | 0    | 0.14 | 2.33 |
| NM_001080400 | KUI5f8tn3RrpeOnQVI | KIAA1881 | 8.24  | 0    | 0.19 | 2.37 |
| NM_016084    | ZtKFRqk837e49avnuE | RASD1    | 10.46 | 0    | 0.21 | 2.38 |
| NM_001845    | TTZOhZKKkj2hRyl4Dg | COL4A1   | 9.9   | 0    | 0.09 | 2.43 |
| NM_007069    | 9kJvkoOp_kiOJfPotM | HRASLS3  | 8.72  | 0    | 0.12 | 2.48 |
| NM_001928    | NkEC1YkOC01HXk3r60 | CFD      | 11.44 | 0    | 0.23 | 2.5  |
| NM_012329    | 6p_X8jaueM_Xv1yw6k | MMD      | 10.18 | 0.01 | 0.27 | 2.5  |
| NM_015714    | xHuohSaLqKiGSyEiEg | G0S2     | 8.43  | 0    | 0.21 | 2.51 |
| XM_001716425 | uorqeiSu6V497vnfdM | FAM180B  | 10.89 | 0    | 0.22 | 2.58 |
| NM_003251    | lnelfn.xXUiclrJlt0 | THRSP    | 8.52  | 0    | 0.2  | 2.6  |
| NM_012098    | EbqUp7ul76O.rHtTt4 | ANGPTL2  | 9.51  | 0    | 0.08 | 2.7  |
| NM_005276    | orHi7UieXVSivCuqkA | GPD1     | 8.59  | 0    | 0.14 | 2.7  |
| NM_003480    | Z0YH4V1x1E_QT9TSEk | MFAP5    | 9.86  | 0    | 0.14 | 2.77 |
| NM_000237    | uHwCPRwJJeyR6gd6dY | LPL      | 8.9   | 0    | 0.21 | 2.86 |
| NM_020918    | NjaJ39f4ylgSVQ416c | GPAM     | 9.07  | 0    | 0.24 | 2.89 |
| NM_000072    | 6uXPf6fDiHqFPriCk  | CD36     | 9.44  | 0    | 0.14 | 3.07 |
| NM_007085    | Q.oCSr13l5wQIRuhS0 | FSTL1    | 10.18 | 0    | 0.05 | 3.15 |
| NM_013363    | uSKJJzePoBeWHy5rjl | PCOLCE2  | 9.88  | 0    | 0.08 | 3.64 |
| NM_001442    | xiRTBfl6q7XrE7kgOo | FABP4    | 10.01 | 0    | 0.12 | 3.85 |
| NM_000230    | uyQvciCKeue6Uq4iec | LEP      | 10.7  | 0    | 0.14 | 5.03 |

**Online Resource 2**

List of differentially expressed genes in fascia ( $q < 30\%$ ) from microarray, fold=RH/NC.

| RefSeq    | nuID               | Symbol  | AveExpr | p | q    | Fold |
|-----------|--------------------|---------|---------|---|------|------|
| NM_013372 | 6qgEA34VJ4E7fXi0uU | GREM1   | 8.49    | 0 | 0    | 0.22 |
| NM_000949 | W1Sdf051P.BR_Xf3Uk | PRLR    | 7.53    | 0 | 0.27 | 0.39 |
| NM_003240 | HXFXIR13oh4I_VuTPw | LEFTY2  | 7.5     | 0 | 0.24 | 0.43 |
| NM_007281 | uqcH_ecovQIOXkdZd0 | SCRG1   | 7.2     | 0 | 0.24 | 0.44 |
| NM_014746 | rX0uKrJxOVTI5X9.X0 | RNF144A | 9.68    | 0 | 0.3  | 0.49 |
|           | ip45H8H_6l6hTHXEik |         | 8.18    | 0 | 0.24 | 0.51 |
| NM_013377 | ZijnFL9rls4_Xb006Y | PDZRN4  | 6.95    | 0 | 0.24 | 0.54 |

**Online Resource 3** GO BP Conditional test for over-representation in skin microarray

| GOBPID     | P     | OR     | ExpCnt | Cnt | Size | Term                                                             |
|------------|-------|--------|--------|-----|------|------------------------------------------------------------------|
| GO:0006817 | 0     | 13.053 | 1      | 9   | 60   | phosphate transport                                              |
| GO:0006820 | 0     | 6.124  | 2      | 9   | 117  | anion transport                                                  |
| GO:0007584 | 0     | 10.544 | 1      | 5   | 39   | response to nutrient                                             |
| GO:0009991 | 0     | 7.589  | 1      | 6   | 63   | response to extracellular stimulus                               |
| GO:0030199 | 0     | 30.329 | 0      | 3   | 10   | collagen fibril organization                                     |
| GO:0050878 | 0.001 | 6.449  | 1      | 6   | 73   | regulation of body fluid levels                                  |
| GO:0007275 | 0.001 | 1.993  | 21     | 35  | 1441 | multicellular organismal development                             |
| GO:0009611 | 0.001 | 3.183  | 4      | 11  | 265  | response to wounding                                             |
| GO:0007160 | 0.001 | 6.624  | 1      | 5   | 59   | cell-matrix adhesion                                             |
| GO:0051260 | 0.002 | 14.361 | 0      | 3   | 18   | protein homooligomerization                                      |
| GO:0055088 | 0.002 | 14.141 | 0      | 3   | 18   | lipid homeostasis                                                |
| GO:0007596 | 0.003 | 7.213  | 1      | 4   | 44   | blood coagulation                                                |
| GO:0043434 | 0.005 | 10.094 | 0      | 3   | 24   | response to peptide hormone stimulus                             |
| GO:0006629 | 0.005 | 2.285  | 7      | 15  | 501  | lipid metabolic process                                          |
| GO:0007155 | 0.007 | 2.356  | 6      | 13  | 437  | cell adhesion                                                    |
| GO:0030509 | 0.01  | 7.303  | 0      | 3   | 32   | BMP signaling pathway                                            |
| GO:0050776 | 0.012 | 4.892  | 1      | 4   | 62   | regulation of immune response                                    |
| GO:0006641 | 0.012 | 14.037 | 0      | 2   | 12   | triacylglycerol metabolic process                                |
| GO:0009612 | 0.012 | 14.037 | 0      | 2   | 12   | response to mechanical stimulus                                  |
| GO:0005996 | 0.012 | 3.871  | 1      | 5   | 97   | monosaccharide metabolic process                                 |
| GO:0031960 | 0.014 | 12.759 | 0      | 2   | 13   | response to corticosteroid stimulus                              |
| GO:0006006 | 0.015 | 4.501  | 1      | 4   | 67   | glucose metabolic process                                        |
| GO:0007169 | 0.016 | 3.129  | 2      | 6   | 143  | transmembrane receptor protein tyrosine kinase signaling pathway |
| GO:0042632 | 0.016 | 11.694 | 0      | 2   | 14   | cholesterol homeostasis                                          |
| GO:0007167 | 0.017 | 4.311  | 1      | 4   | 72   | enzyme linked receptor protein signaling pathway                 |
| GO:0048584 | 0.018 | 4.295  | 1      | 4   | 70   | positive regulation of response to stimulus                      |
| GO:0048519 | 0.019 | 1.798  | 11     | 19  | 813  | negative regulation of biological process                        |
| GO:0006638 | 0.019 | 10.794 | 0      | 2   | 15   | neutral lipid metabolic process                                  |
| GO:0030168 | 0.019 | 10.794 | 0      | 2   | 15   | platelet activation                                              |
| GO:0050818 | 0.019 | 10.794 | 0      | 2   | 15   | regulation of coagulation                                        |
| GO:0018212 | 0.019 | 5.718  | 1      | 3   | 40   | peptidyl-tyrosine modification                                   |
| GO:0006869 | 0.019 | 4.167  | 1      | 4   | 72   | lipid transport                                                  |
| GO:0048513 | 0.02  | 2.025  | 7      | 13  | 508  | organ development                                                |
| GO:0002253 | 0.02  | 5.567  | 1      | 3   | 41   | activation of immune response                                    |
| GO:0019217 | 0.021 | 10.022 | 0      | 2   | 16   | regulation of fatty acid metabolic process                       |

|            |       |        |   |    |     |                                                                  |
|------------|-------|--------|---|----|-----|------------------------------------------------------------------|
| GO:0046486 | 0.021 | 10.022 | 0 | 2  | 16  | glycerolipid metabolic process                                   |
| GO:0006662 | 0.024 | 9.352  | 0 | 2  | 17  | glycerol ether metabolic process                                 |
| GO:0042542 | 0.024 | 9.352  | 0 | 2  | 17  | response to hydrogen peroxide                                    |
| GO:0006469 | 0.026 | 5.035  | 1 | 3  | 45  | negative regulation of protein kinase activity                   |
| GO:0002684 | 0.026 | 3.775  | 1 | 4  | 79  | positive regulation of immune system process                     |
| GO:0051348 | 0.028 | 4.917  | 1 | 3  | 46  | negative regulation of transferase activity                      |
| GO:0009888 | 0.032 | 2.44   | 3 | 7  | 212 | tissue development                                               |
| GO:0043549 | 0.032 | 2.655  | 2 | 6  | 167 | regulation of kinase activity                                    |
| GO:0008283 | 0.032 | 1.877  | 7 | 13 | 516 | cell proliferation                                               |
| GO:0009719 | 0.034 | 3.45   | 1 | 4  | 86  | response to endogenous stimulus                                  |
| GO:0030334 | 0.038 | 4.312  | 1 | 3  | 52  | regulation of cell migration                                     |
| GO:0043406 | 0.038 | 4.312  | 1 | 3  | 52  | positive regulation of MAP kinase activity                       |
| GO:0002541 | 0.039 | 7.01   | 0 | 2  | 22  | activation of plasma proteins during acute inflammatory response |
| GO:0048585 | 0.042 | 6.676  | 0 | 2  | 23  | negative regulation of response to stimulus                      |
| GO:0001501 | 0.045 | 3.141  | 1 | 4  | 94  | skeletal development                                             |
| GO:0050730 | 0.045 | 6.372  | 0 | 2  | 24  | regulation of peptidyl-tyrosine phosphorylation                  |
| GO:0030855 | 0.048 | 6.143  | 0 | 2  | 25  | epithelial cell differentiation                                  |
| GO:0006937 | 0.049 | 6.094  | 0 | 2  | 25  | regulation of muscle contraction                                 |

---

**Online Resource 4** GO MF Conditional test for over-representation in skin microarray

| GOMFID     | P     | OR     | ExpCnt | Cnt | Size | Term                                                 |
|------------|-------|--------|--------|-----|------|------------------------------------------------------|
| GO:0005201 | 0     | 21.307 | 1      | 10  | 48   | extracellular matrix structural constituent          |
| GO:0004857 | 0     | 5.918  | 2      | 11  | 161  | enzyme inhibitor activity                            |
| GO:0004867 | 0     | 9.461  | 1      | 6   | 56   | serine-type endopeptidase inhibitor activity         |
| GO:0005518 | 0.001 | 22.997 | 0      | 3   | 13   | collagen binding                                     |
| GO:0005178 | 0.001 | 10.637 | 0      | 4   | 33   | integrin binding                                     |
| GO:0005529 | 0.001 | 5.373  | 1      | 6   | 93   | sugar binding                                        |
| GO:0030247 | 0.002 | 6.458  | 1      | 5   | 65   | polysaccharide binding                               |
| GO:0008201 | 0.004 | 7      | 1      | 4   | 48   | heparin binding                                      |
| GO:0005515 | 0.004 | 1.711  | 53     | 67  | 4421 | protein binding                                      |
| GO:0005021 | 0.007 | 19.016 | 0      | 2   | 10   | vascular endothelial growth factor receptor activity |
| GO:0005102 | 0.009 | 2.344  | 6      | 12  | 430  | receptor binding                                     |
| GO:0019199 | 0.01  | 5.04   | 1      | 4   | 65   | transmembrane receptor protein kinase activity       |
| GO:0005507 | 0.022 | 5.33   | 1      | 3   | 46   | copper ion binding                                   |
| GO:0005520 | 0.028 | 8.443  | 0      | 2   | 20   | insulin-like growth factor binding                   |
| GO:0008430 | 0.033 | 7.597  | 0      | 2   | 22   | selenium binding                                     |
| GO:0005509 | 0.038 | 1.823  | 8      | 13  | 573  | calcium ion binding                                  |
| GO:0004866 | 0.045 | 6.397  | 0      | 2   | 27   | endopeptidase inhibitor activity                     |
| GO:0004872 | 0.048 | 1.636  | 11     | 17  | 838  | receptor activity                                    |

**Online Resource 5** GO CC Conditional test for over-representation in skin microarray

| GOCCID     | P     | OR     | ExpCnt | Cnt | Size | Term                               |
|------------|-------|--------|--------|-----|------|------------------------------------|
| GO:0005578 | 0     | 10.222 | 2      | 13  | 126  | proteinaceous extracellular matrix |
| GO:0044421 | 0     | 10.395 | 1      | 11  | 114  | extracellular region part          |
| GO:0005615 | 0     | 5.32   | 3      | 16  | 263  | extracellular space                |
| GO:0005576 | 0     | 3.663  | 6      | 18  | 570  | extracellular region               |
| GO:0005604 | 0     | 10.098 | 1      | 5   | 43   | basement membrane                  |
| GO:0005581 | 0.002 | 14.644 | 0      | 3   | 19   | collagen                           |
| GO:0031093 | 0.003 | 12.621 | 0      | 3   | 21   | platelet alpha granule lumen       |
| GO:0031983 | 0.003 | 11.955 | 0      | 3   | 22   | vesicle lumen                      |
| GO:0005625 | 0.008 | 3.65   | 2      | 6   | 132  | soluble fraction                   |
| GO:0001725 | 0.009 | 16.715 | 0      | 2   | 11   | stress fiber                       |



**Online Resource 6** Validation of target genes *COL1A1* and *GREM1* by Quantitative RT-PCR. Quantitative RT-PCR with cDNA generated from the same total RNA samples as were used for the microarray experiments. *COL1A1* and *GREM1* were target genes. Change in gene expression is represented as fold increase in the skin and fascia from RH patients as compared to NC patients. *GAPDH* was used as an endogenous control. The y-axis depicts the expression level ( $-\Delta CT$ ), and the solid horizontal line denotes the group median. *COL1A1* in skin is significantly different between groups ( $p=0.034$ ) as well as *GREM1* in fascia ( $p=0.034$ ), using an exact Mann-Whitney test (one-sided).  $p$  values for *GREM1* were .102 in the skin and .027 in the fascia. Each sample was run in triplicate. Note that a 1-unit change on this scale implies a 2-fold difference in expression.

### Gene expression of *COL1A1* and *GREM1* in skin and fascia by qPCR

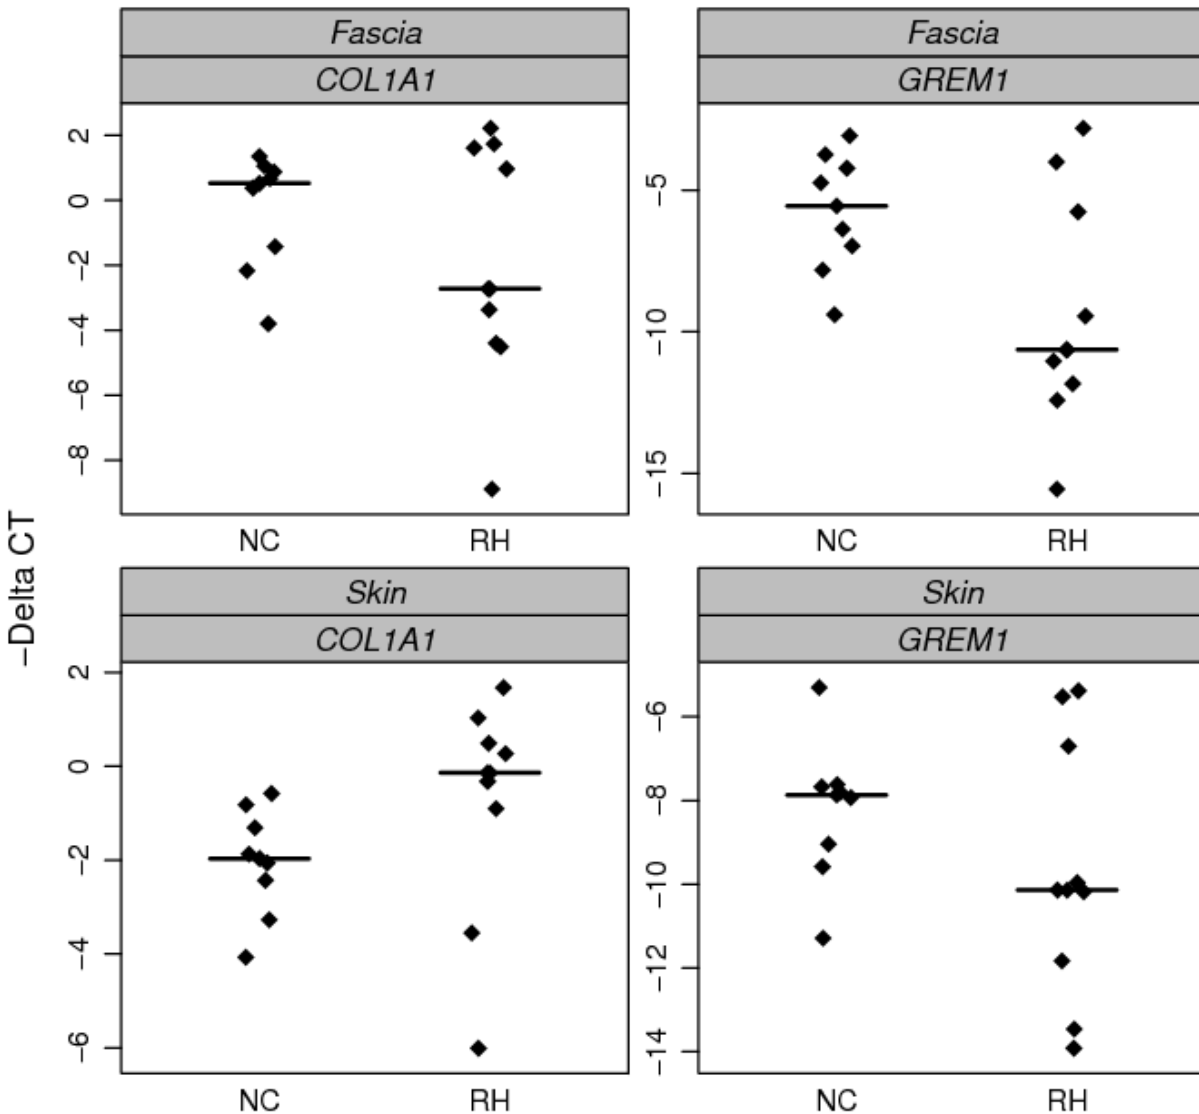

**Online Resource 7** PCR array results from comparison of RH patients (n=8) and NC patients (n=7) in skin. Eighty expressed genes on the Human Fibrosis RT<sup>2</sup> Profiler™ PCR Array System (SABiosciences, Frederick, MD) were tested for differences via moderated t-test and raw p-values and adjusted p-values (q) are reported, along with fold change (RH/NC).

| <b>Gene symbol</b> | <b>-<math>\Delta\Delta C_t</math></b> | <b>p</b> | <b>q</b> | <b>Fold change</b> |
|--------------------|---------------------------------------|----------|----------|--------------------|
| ACTA2              | -1.317                                | 0.088    | 0.290    | 0.401              |
| AGT                | -0.674                                | 0.409    | 0.705    | 0.627              |
| AKT1               | -0.787                                | 0.100    | 0.317    | 0.580              |
| BCL2               | -0.184                                | 0.805    | 0.922    | 0.880              |
| BMP7               | 0.152                                 | 0.826    | 0.927    | 1.111              |
| CAV1               | -1.544                                | 0.019    | 0.159    | 0.343              |
| CCL2               | -0.151                                | 0.833    | 0.927    | 0.901              |
| CCL3               | -1.356                                | 0.070    | 0.275    | 0.391              |
| CCR2               | 0.052                                 | 0.933    | 0.985    | 1.036              |
| CEBPB              | 0.017                                 | 0.969    | 0.991    | 1.012              |
| COL1A2             | -1.875                                | 0.017    | 0.159    | 0.273              |
| COL3A1             | -1.894                                | 0.020    | 0.159    | 0.269              |
| CTGF               | -1.541                                | 0.004    | 0.149    | 0.344              |
| CXCR4              | -0.329                                | 0.572    | 0.821    | 0.796              |
| DCN                | -1.235                                | 0.134    | 0.341    | 0.425              |
| EDN1               | -0.243                                | 0.625    | 0.864    | 0.845              |
| EGF                | 0.005                                 | 0.994    | 0.994    | 1.003              |
| ENG                | -1.155                                | 0.031    | 0.174    | 0.449              |
| FASLG              | -0.305                                | 0.727    | 0.884    | 0.809              |
| GREM1              | 1.611                                 | 0.017    | 0.159    | 3.054              |
| HGF                | -1.425                                | 0.083    | 0.284    | 0.372              |
| IFNG               | -0.418                                | 0.395    | 0.705    | 0.748              |
| IL10               | -1.867                                | 0.023    | 0.167    | 0.274              |
| IL13RA2            | 0.343                                 | 0.610    | 0.860    | 1.268              |
| IL1A               | -1.003                                | 0.153    | 0.378    | 0.499              |
| IL1B               | -1.511                                | 0.109    | 0.332    | 0.351              |
| IL4                | 0.143                                 | 0.763    | 0.899    | 1.104              |
| IL5                | -0.990                                | 0.129    | 0.340    | 0.503              |
| ILK                | -0.550                                | 0.344    | 0.677    | 0.683              |
| ITGA1              | -1.680                                | 0.026    | 0.171    | 0.312              |
| ITGA2              | 0.635                                 | 0.178    | 0.427    | 1.553              |
| ITGA3              | 0.069                                 | 0.878    | 0.963    | 1.049              |
| ITGAV              | -0.325                                | 0.656    | 0.867    | 0.798              |
| ITGB1              | -1.253                                | 0.048    | 0.236    | 0.420              |
| ITGB3              | -1.760                                | 0.008    | 0.154    | 0.295              |
| ITGB5              | -0.853                                | 0.116    | 0.336    | 0.554              |
| ITGB6              | 0.637                                 | 0.357    | 0.677    | 1.556              |

|          |        |       |       |       |
|----------|--------|-------|-------|-------|
| ITGB8    | -0.243 | 0.680 | 0.867 | 0.845 |
| JUN      | -0.949 | 0.075 | 0.275 | 0.518 |
| LOX      | -1.853 | 0.007 | 0.154 | 0.277 |
| LTBP1    | -1.453 | 0.059 | 0.258 | 0.365 |
| MMP1     | 0.455  | 0.432 | 0.71  | 1.371 |
| MMP13    | -0.688 | 0.23  | 0.491 | 0.621 |
| MMP14    | -0.242 | 0.673 | 0.867 | 0.845 |
| MMP2     | -1.292 | 0.123 | 0.336 | 0.408 |
| MMP3     | -1.315 | 0.064 | 0.267 | 0.402 |
| MMP9     | -1.287 | 0.03  | 0.174 | 0.41  |
| MYC      | 0.022  | 0.979 | 0.991 | 1.015 |
| NFKB1    | -0.329 | 0.489 | 0.757 | 0.796 |
| PDGFA    | -0.447 | 0.247 | 0.513 | 0.734 |
| PDGFB    | -0.445 | 0.463 | 0.746 | 0.735 |
| PLAT     | 0.188  | 0.804 | 0.922 | 1.14  |
| PLAU     | 0.299  | 0.659 | 0.867 | 1.231 |
| SERPINA1 | -0.227 | 0.699 | 0.87  | 0.855 |
| SERPINE1 | -1.97  | 0.015 | 0.159 | 0.255 |
| SERPINH1 | -0.959 | 0.186 | 0.432 | 0.514 |
| SMAD2    | -0.302 | 0.537 | 0.813 | 0.811 |
| SMAD3    | 0.028  | 0.96  | 0.991 | 1.02  |
| SMAD4    | -0.271 | 0.705 | 0.87  | 0.829 |
| SMAD6    | -1.225 | 0.122 | 0.336 | 0.428 |
| SMAD7    | -0.344 | 0.556 | 0.813 | 0.788 |
| SNAI1    | -0.501 | 0.346 | 0.677 | 0.707 |
| SP1      | 0.229  | 0.75  | 0.898 | 1.172 |
| STAT1    | -0.055 | 0.911 | 0.985 | 0.963 |
| STAT6    | 0.448  | 0.41  | 0.705 | 1.364 |
| TGFB1    | -0.389 | 0.426 | 0.71  | 0.764 |
| TGFB2    | -0.371 | 0.634 | 0.864 | 0.773 |
| TGFB3    | -0.575 | 0.36  | 0.677 | 0.671 |
| TGFBR1   | -1.175 | 0.041 | 0.214 | 0.443 |
| TGFBR2   | -1.057 | 0.077 | 0.275 | 0.481 |
| TGIF1    | -0.39  | 0.55  | 0.813 | 0.763 |
| THBS1    | -1.332 | 0.014 | 0.159 | 0.397 |
| THBS2    | -1.032 | 0.055 | 0.257 | 0.489 |
| TIMP1    | -0.594 | 0.38  | 0.699 | 0.662 |
| TIMP2    | -1.056 | 0.195 | 0.441 | 0.481 |
| TIMP3    | 0.036  | 0.935 | 0.985 | 1.025 |
| TIMP4    | -2.812 | 0.002 | 0.149 | 0.142 |
| TNF      | -0.657 | 0.202 | 0.443 | 0.634 |
| VEGFA    | 0.527  | 0.476 | 0.752 | 1.441 |

---

**Online Resource 8** The distribution of relative gene expression in fascia and skin. The vertical lines correspond to 1.5-fold [broken] or 2-fold [solid] mean changes in relative expression. A comparison of (a) fascia and (b) skin illustrates that there is more variability in the gene fold changes for fascia than skin. Scales are  $\log_2$ .

(a)

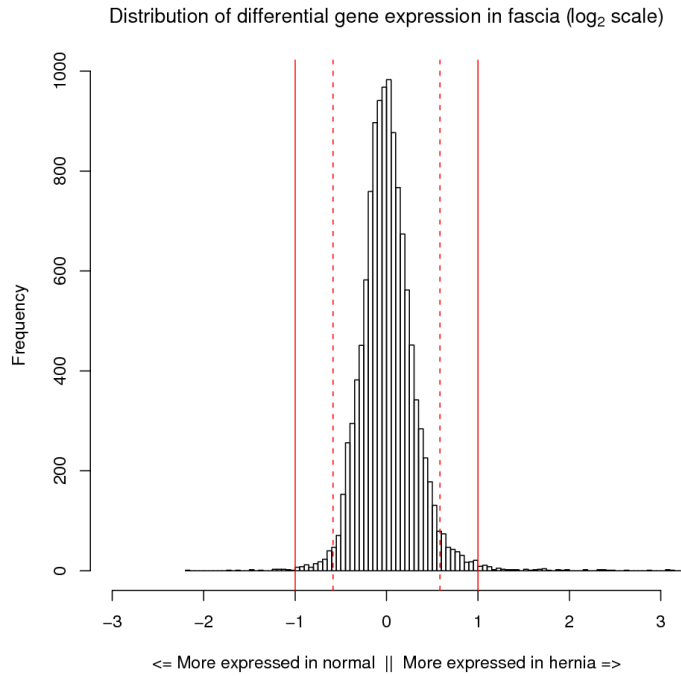

(b)

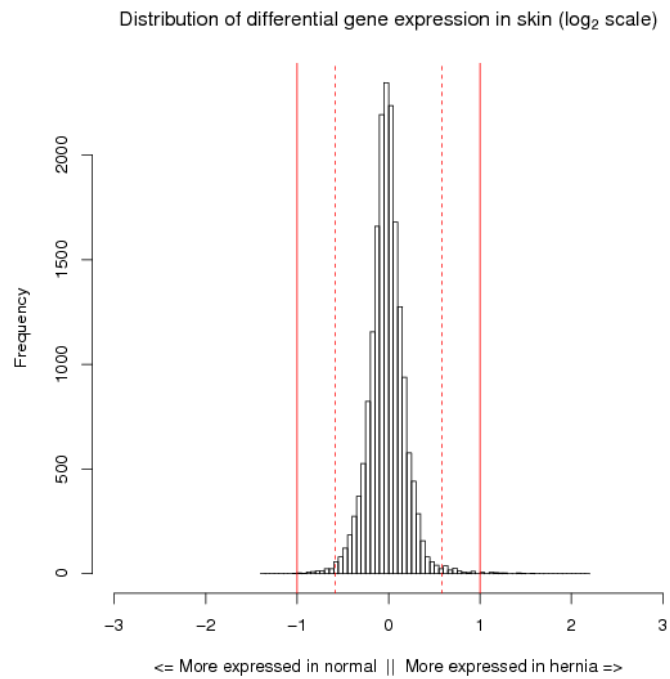

**Online Resource 9** Fold change versus mean normalized signal in fascia and skin. The relationship between the fold change for (a) fascia and the background-adjusted and normalized fascia signal on a logarithmic scale is shown. A similar plot is shown for (b) skin. Hexagon binning is used to elucidate the distribution of the data. Darker shades indicate increased data density. Single blue points represent the differentially expressed genes, some of which are given in Tables 2 and 3 of the text, while the broken red lines indicate the  $\log_2$  equivalent of 1.5-fold change. Scales are  $\log_2$ .

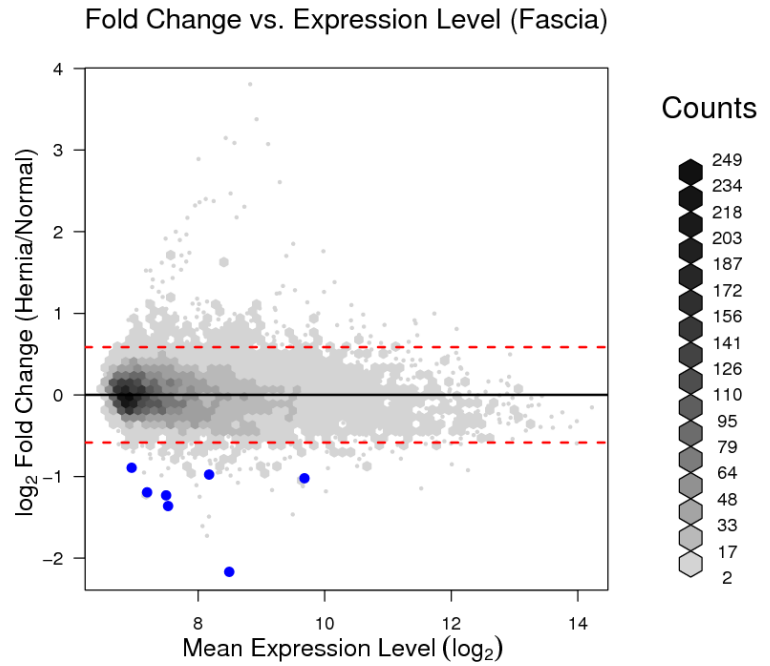

(b)

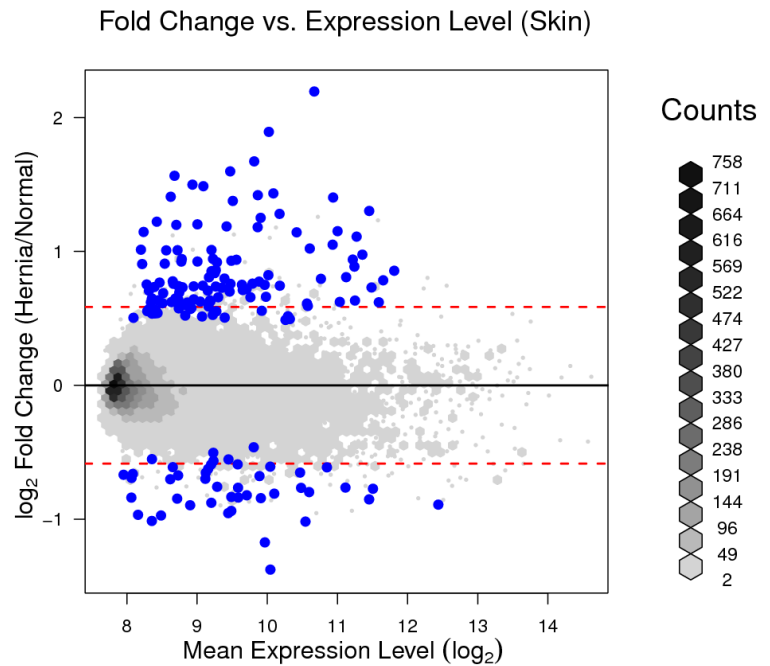

Supplement: MOESM1 [file 8698320]
